# Supplementary material
Source: PubMed Central journal article supplement (PMC2773494)
Supplement: blood-2009-06-227843_1.pdf [file blood-2009-06-227843_1.pdf]

| Group    | Input           |          | Output                    |                          |                           |                   |
|----------|-----------------|----------|---------------------------|--------------------------|---------------------------|-------------------|
|          | BMNC            | CD34-LKS | Absolute number           |                          | Yield/initial CD34-LKS    |                   |
|          |                 |          | BMNC<br>( $\times 10^6$ ) | LKS<br>( $\times 10^3$ ) | BMNC<br>( $\times 10^5$ ) | LKS               |
| Leukemia | $1 \times 10^7$ | 47       | 3.18 $\pm$ 1.16           | 1.26 $\pm$ 0.79          | 0.68 $\pm$ 0.25           | 2.69 $\pm$ 1.68   |
| Control  | $1 \times 10^7$ | 47       | 7.07 $\pm$ 1.12**         | 6.29 $\pm$ 3.55*         | 1.50 $\pm$ 0.24**         | 13.43 $\pm$ 7.57* |

\*,  $P=0.03$ ; \*\*,  $P=0.003$
