# Supplementary material
Source: PubMed Central journal article supplement (PMC2773494)
Supplement: blood-2009-06-227843_2.pdf [file blood-2009-06-227843_2.pdf]

| Primer |         | Sequence(5' - 3')                 | Size(bp) |
|--------|---------|-----------------------------------|----------|
| p18    | Forward | TTA TGA AGC ACA CAG CCT GCA ATG T | 200      |
|        | Reverse | ACG GAC AGC CAA CCA ACT AAC GG    |          |
| p21    | Forward | AAT CCT GGT GAT GTC CGA CC        | 460      |
|        | Reverse | TTG CAG AAG ACC AAT CTG CG        |          |
| p27    | Forward | TAT GGA AGA AGC GAG TCA GC        | 334      |
|        | Reverse | GCG AAG AAG AAT CTT CTG CAG       |          |
| Gfi-1  | Forward | TAT CCG AGG GGC CAA ACA TTC G     | 188      |
|        | Reverse | ATT TTC GAC TCG CCT GCA CTC       |          |
